# Supplementary material for: Quantification of global mitochondrial DNA methylation levels and inverse correlation with age at two CpG sites
Source: Aging (Albany NY). 2016 Feb 17;8(4):636–41. doi: 10.18632/aging.100892 (PMC4925819; doi:10.18632/aging.100892)
Supplement: Supplementary file 3 [file aging-08-636-s003.xlsx]

## Sheet: hg38-Mito. primer sequence
Target	Chr	Strand	Forward_primer_Sequence	Reverse_Primer_Sequence	ROI_Genomic_Sequence	Genomic_Amplicon_Sequence_with_primer	Bisulfite_Amplicon_Sequence_with_primer	Genomic_Amplicon_Sequence_wo_primer	Bisulfite_Amplicon_Sequence_wo_primer
Promoter_(-)	chrM	-	TTTATTTGTTTATGGGGTGATGTGAGTT	AACCTAACCAAATTTCAAATTTTATCTTTTAA	TTGCATGTGTAATCTTACTAAGAGCTAATAGAAAGGCTAGGACCAAACCTATTTGTTTATGGGGTGATGTGAGCCCGTCTAAACATTTTCAGTGTATTGCTTTGAGGAGGTAAGCTACATAAACTGTGGGGGGTGTCTTTGGGGTTTGGTTGGTTCGGGGTATGGGGTTAGCAGCGGTGTGTGTGTGCTGGGTAGGATGGGCGGGGGTTGTATTGATGAGATTAGTAGTATGGGAGTGGGAGGGGAAAATAATGTGTTAGTTGGGGGGTGACTGTTAAAAGTGCATACCGCCAAAAGATAAAATTTGAAATCTGGTTAGGCTGGTGTTAGGGTTCTTTGTTTTTGGGGTTTGGCAGAGATGTGTTTAAGTGCTGTGGCCAGAAGCGGGGGAGGGGGGGT…	CCTATTTGTTTATGGGGTGATGTGAGCCCGTCTAAACATTTTCAGTGTATTGCTTTGAGGAGGTAAGCTACATAAACTGTGGGGGGTGTCTTTGGGGTTTGGTTGGTTCGGGGTATGGGGTTAGCAGCGGTGTGTGTGTGCTGGGTAGGATGGGCGGGGGTTGTATTGATGAGATTAGTAGTATGGGAGTGGGAGGGGAAAATAATGTGTTAGTTGGGGGGTGACTGTTAAAAGTGCATACCGCCAAAAGATAAAATTTGAAATCTGGTTAGGCT	TTTATTTGTTTATGGGGTGATGTGAGTTCGTTTAAATATTTTTAGTGTATTGTTTTGAGGAGGTAAGTTATATAAATTGTGGGGGGTGTTTTTGGGGTTTGGTTGGTTCGGGGTATGGGGTTAGTAGCGGTGTGTGTGTGTTGGGTAGGATGGGCGGGGGTTGTATTGATGAGATTAGTAGTATGGGAGTGGGAGGGGAAAATAATGTGTTAGTTGGGGGGTGATTGTTAAAAGTGTATATCGTTAAAAGATAAAATTTGAAATTTGGTTAGGTT	CGTCTAAACATTTTCAGTGTATTGCTTTGAGGAGGTAAGCTACATAAACTGTGGGGGGTGTCTTTGGGGTTTGGTTGGTTCGGGGTATGGGGTTAGCAGCGGTGTGTGTGTGCTGGGTAGGATGGGCGGGGGTTGTATTGATGAGATTAGTAGTATGGGAGTGGGAGGGGAAAATAATGTGTTAGTTGGGGGGTGACTGTTAAAAGTGCATACCG	CGTTTAAATATTTTTAGTGTATTGTTTTGAGGAGGTAAGTTATATAAATTGTGGGGGGTGTTTTTGGGGTTTGGTTGGTTCGGGGTATGGGGTTAGTAGCGGTGTGTGTGTGTTGGGTAGGATGGGCGGGGGTTGTATTGATGAGATTAGTAGTATGGGAGTGGGAGGGGAAAATAATGTGTTAGTTGGGGGGTGATTGTTAAAAGTGTATATCG
12S_Ribosomal_RNA	chrM	+	GAGTTATAGTTTAAAATTTAAAGGATTTGG	CCATTTCTTACCACCTCATAAAC	CCATCCTACCCAGCACACACACACCGCTGCTAACCCCATACCCCGAACCAACCAAACCCCAAAGACACCCCCCACAGTTTATGTAGCTTACCTCCTCAAAGCAATACACTGAAAATGTTTAGACGGGCTCACATCACCCCATAAACAAATAGGTTTGGTCCTAGCCTTTCTATTAGCTCTTAGTAAGATTACACATGCAAGCATCCCCGTTCCAGTGAGTTCACCCTCTAAATCACCACGATCAAAAGGAACAAGCATCAAGCACGCAGCAATGCAGCTCAAAACGCTTAGCCTAGCCACACCCCCACGGGAAACAGCAGTGATTAACCTTTAGCAATAAACGAAAGTTTAACTAAGCTATACTAACCCCAGGGTTGGTCAATTTCGTGCCAGCCACCG…	GAGCCACAGCTTAAAACTCAAAGGACCTGGCGGTGCTTCATATCCCTCTAGAGGAGCCTGTTCTGTAATCGATAAACCCCGATCAACCTCACCACCTCTTGCTCAGCCTATATACCGCCATCTTCAGCAAACCCTGATGAAGGCTACAAAGTAAGCGCAAGTACCCACGTAAAGACGTTAGGTCAAGGTGTAGCCCATGAGGTGGCAAGAAATGG	GAGTTATAGTTTAAAATTTAAAGGATTTGGCGGTGTTTTATATTTTTTTAGAGGAGTTTGTTTTGTAATCGATAAATTTCGATTAATTTTATTATTTTTTGTTTAGTTTATATATCGTTATTTTTAGTAAATTTTGATGAAGGTTATAAAGTAAGCGTAAGTATTTACGTAAAGACGTTAGGTTAAGGTGTAGTTTATGAGGTGGTAAGAAATGG	CGGTGCTTCATATCCCTCTAGAGGAGCCTGTTCTGTAATCGATAAACCCCGATCAACCTCACCACCTCTTGCTCAGCCTATATACCGCCATCTTCAGCAAACCCTGATGAAGGCTACAAAGTAAGCGCAAGTACCCACGTAAAGACGTTAGGTCAAGGTGTA	CGGTGTTTTATATTTTTTTAGAGGAGTTTGTTTTGTAATCGATAAATTTCGATTAATTTTATTATTTTTTGTTTAGTTTATATATCGTTATTTTTAGTAAATTTTGATGAAGGTTATAAAGTAAGCGTAAGTATTTACGTAAAGACGTTAGGTTAAGGTGTA
Origin_of_Light_Strand	chrM	+	TTAGTTAATAGTTAAGTATTTTAATTAATTGGTTTT	AAACTATACCTAAAACTCCAACTCA	CCTTCAAAGCCCTCAGTAAGTTGCAATACTTAATTTCTGTAACAGCTAAGGACTGCAAAACCCCACTCTGCATCAACTGAACGCAAATCAGCCACTTTAATTAAGCTAAGCCCTTACTAGACCAATGGGACTTAAACCCACAAACACTTAGTTAACAGCTAAGCACCCTAATCAACTGGCTTCAATCTACTTCTCCCGCCGCCGGGAAAAAAGGCGGGAGAAGCCCCGGCAGGTTTGAAGCTGCTTCTTCGAATTTGCAATTCAATATGAAAATCACCTCGGAGCTGGTAAAAAGAGGCCTAACCCCTGTCTTTAGATTTACAGTCCAATGCTTCACTCAGCCATTTTACCTCACCCCCACTGATGTTCGCCGACCGTTGACTATTCTCTACAAACCAC…	TTAGTTAACAGCTAAGCACCCTAATCAACTGGCTTCAATCTACTTCTCCCGCCGCCGGGAAAAAAGGCGGGAGAAGCCCCGGCAGGTTTGAAGCTGCTTCTTCGAATTTGCAATTCAATATGAAAATCACCTCGGAGCTGGTAAAAAGAGGCCTAACCCCTGTCTTTAGATTTACAGTCCAATGCTTCACTCAGCCATTTTACCTCACCCCCACTGATGTTCGCCGACCGTTGACTATTCTCTACAAACCACAAAGACATTGGAACACTATACCTATTATTCGGCGCATGAGCTGGAGTCCTAGGCACAGCTC	TTAGTTAATAGTTAAGTATTTTAATTAATTGGTTTTAATTTATTTTTTTCGTCGTCGGGAAAAAAGGCGGGAGAAGTTTCGGTAGGTTTGAAGTTGTTTTTTCGAATTTGTAATTTAATATGAAAATTATTTCGGAGTTGGTAAAAAGAGGTTTAATTTTTGTTTTTAGATTTATAGTTTAATGTTTTATTTAGTTATTTTATTTTATTTTTATTGATGTTCGTCGATCGTTGATTATTTTTTATAAATTATAAAGATATTGGAATATTATATTTATTATTCGGCGTATGAGTTGGAGTTTTAGGTATAGTTT	AATCTACTTCTCCCGCCGCCGGGAAAAAAGGCGGGAGAAGCCCCGGCAGGTTTGAAGCTGCTTCTTCGAATTTGCAATTCAATATGAAAATCACCTCGGAGCTGGTAAAAAGAGGCCTAACCCCTGTCTTTAGATTTACAGTCCAATGCTTCACTCAGCCATTTTACCTCACCCCCACTGATGTTCGCCGACCGTTGACTATTCTCTACAAACCACAAAGACATTGGAACACTATACCTATTATTCGGCGCA	AATTTATTTTTTTCGTCGTCGGGAAAAAAGGCGGGAGAAGTTTCGGTAGGTTTGAAGTTGTTTTTTCGAATTTGTAATTTAATATGAAAATTATTTCGGAGTTGGTAAAAAGAGGTTTAATTTTTGTTTTTAGATTTATAGTTTAATGTTTTATTTAGTTATTTTATTTTATTTTTATTGATGTTCGTCGATCGTTGATTATTTTTTATAAATTATAAAGATATTGGAATATTATATTTATTATTCGGCGTA
Cytochrome_C_Oxidase_subunit-1	chrM	+	TTGTTTTTAGATTTATAGTTTAATGTTTTATTTAG	AAAAACTAATCAATTACCAAAACCTC	CTGCTTCTTCGAATTTGCAATTCAATATGAAAATCACCTCGGAGCTGGTAAAAAGAGGCCTAACCCCTGTCTTTAGATTTACAGTCCAATGCTTCACTCAGCCATTTTACCTCACCCCCACTGATGTTCGCCGACCGTTGACTATTCTCTACAAACCACAAAGACATTGGAACACTATACCTATTATTCGGCGCATGAGCTGGAGTCCTAGGCACAGCTCTAAGCCTCCTTATTCGAGCCGAGCTGGGCCAGCCAGGCAACCTTCTAGGTAACGACCACATCTACAACGTTATCGTCACAGCCCATGCATTTGTAATAATCTTCTTCATAGTAATACCCATCATAATCGGAGGCTTTGGCAACTGACTAGTTCCCCTAATAATCGGTGCCCCCGATATG…	CTGTCTTTAGATTTACAGTCCAATGCTTCACTCAGCCATTTTACCTCACCCCCACTGATGTTCGCCGACCGTTGACTATTCTCTACAAACCACAAAGACATTGGAACACTATACCTATTATTCGGCGCATGAGCTGGAGTCCTAGGCACAGCTCTAAGCCTCCTTATTCGAGCCGAGCTGGGCCAGCCAGGCAACCTTCTAGGTAACGACCACATCTACAACGTTATCGTCACAGCCCATGCATTTGTAATAATCTTCTTCATAGTAATACCCATCATAATCGGAGGCTTTGGCAACTGACTAGTTCCC	TTGTTTTTAGATTTATAGTTTAATGTTTTATTTAGTTATTTTATTTTATTTTTATTGATGTTCGTCGATCGTTGATTATTTTTTATAAATTATAAAGATATTGGAATATTATATTTATTATTCGGCGTATGAGTTGGAGTTTTAGGTATAGTTTTAAGTTTTTTTATTCGAGTCGAGTTGGGTTAGTTAGGTAATTTTTTAGGTAACGATTATATTTATAACGTTATCGTTATAGTTTATGTATTTGTAATAATTTTTTTTATAGTAATATTTATTATAATCGGAGGTTTTGGTAATTGATTAGTTTTT	CCATTTTACCTCACCCCCACTGATGTTCGCCGACCGTTGACTATTCTCTACAAACCACAAAGACATTGGAACACTATACCTATTATTCGGCGCATGAGCTGGAGTCCTAGGCACAGCTCTAAGCCTCCTTATTCGAGCCGAGCTGGGCCAGCCAGGCAACCTTCTAGGTAACGACCACATCTACAACGTTATCGTCACAGCCCATGCATTTGTAATAATCTTCTTCATAGTAATACCCATCATAATCG	TTATTTTATTTTATTTTTATTGATGTTCGTCGATCGTTGATTATTTTTTATAAATTATAAAGATATTGGAATATTATATTTATTATTCGGCGTATGAGTTGGAGTTTTAGGTATAGTTTTAAGTTTTTTTATTCGAGTCGAGTTGGGTTAGTTAGGTAATTTTTTAGGTAACGATTATATTTATAACGTTATCGTTATAGTTTATGTATTTGTAATAATTTTTTTTATAGTAATATTTATTATAATCG
Cytochrome_C_Oxidase_subunit-2_2	chrM	+	AAATTAATTGGTTATTAATGGTATTGAATTT	TACTCCACAAATTTCAAAACATTAAC	tcgaaccccccaaagctggtttcaagccaaccccatggcctccatgactttttcAAAAAGGTATTAGAAAAACCATTTCATAACTTTGTCAAAGTTAAATTATAGGCTAAATCCTATATATCTTAATGGCACATGCAGCGCAAGTAGGTCTACAAGACGCTACTTCCCCTATCATAGAAGAGCTTATCACCTTTCATGATCACGCCCTCATAATCATTTTCCTTATCTGCTTCCTAGTCCTGTATGCCCTTTTCCTAACACTCACAACAAAACTAACTAATACTAACATCTCAGACGCTCAGGAAATAGAAACCGTCTGAACTATCCTGCCCGCCATCATCCTAGTCCTCATCGCCCTCCCATCCCTACGCATCCTTTACATAACAGACGAGGTCAACG…	AAATCAATTGGCCACCAATGGTACTGAACCTACGAGTACACCGACTACGGCGGACTAATCTTCAACTCCTACATACTTCCCCCATTATTCCTAGAACCAGGCGACCTGCGACTCCTTGACGTTGACAATCGAGTAGTACTCCCGATTGAAGCCCCCATTCGTATAATAATTACATCACAAGACGTCTTGCACTCATGAGCTGTCCCCACATTAGGCTTAAAAACAGATGCAATTCCCGGACGTCTAAACCAAACCACTTTCACCGCTACACGACCGGGGGTATACTACGGTCAATGCTCTGAAATCTGTGGAGCA	AAATTAATTGGTTATTAATGGTATTGAATTTACGAGTATATCGATTACGGCGGATTAATTTTTAATTTTTATATATTTTTTTTATTATTTTTAGAATTAGGCGATTTGCGATTTTTTGACGTTGATAATCGAGTAGTATTTTCGATTGAAGTTTTTATTCGTATAATAATTATATTATAAGACGTTTTGTATTTATGAGTTGTTTTTATATTAGGTTTAAAAATAGATGTAATTTTCGGACGTTTAAATTAAATTATTTTTATCGTTATACGATCGGGGGTATATTACGGTTAATGTTTTGAAATTTGTGGAGTA	ACGAGTACACCGACTACGGCGGACTAATCTTCAACTCCTACATACTTCCCCCATTATTCCTAGAACCAGGCGACCTGCGACTCCTTGACGTTGACAATCGAGTAGTACTCCCGATTGAAGCCCCCATTCGTATAATAATTACATCACAAGACGTCTTGCACTCATGAGCTGTCCCCACATTAGGCTTAAAAACAGATGCAATTCCCGGACGTCTAAACCAAACCACTTTCACCGCTACACGACCGGGGGTATACTACG	ACGAGTATATCGATTACGGCGGATTAATTTTTAATTTTTATATATTTTTTTTATTATTTTTAGAATTAGGCGATTTGCGATTTTTTGACGTTGATAATCGAGTAGTATTTTCGATTGAAGTTTTTATTCGTATAATAATTATATTATAAGACGTTTTGTATTTATGAGTTGTTTTTATATTAGGTTTAAAAATAGATGTAATTTTCGGACGTTTAAATTAAATTATTTTTATCGTTATACGATCGGGGGTATATTACG
T8993G	chrM	+	TTTATGAGYGGGTATAGTGATTATAGGT	ACTTCCAATTAAATACATAAATAAATAACCTACAA	CGGACTCCTGCCTCACTCATTTACACCAACCACCCAACTATCTATAAACCTAGCCATGGCCATCCCCTTATGAGCGGGCACAGTGATTATAGGCTTTCGCTCTAAGATTAAAAATGCCCTAGCCCACTTCTTACCACAAGGCACACCTACACCCCTTATCCCCATACTAGTTATTATCGAAACCATCAGCCTACTCATTCAACCAATAGCCCTGGCCGTACGCCTAACCGCTAACATTACTGCAGGCCACCTACTCATGCACCTAATTGGAAGCGCCACCCTAGCAATATCAACCATTAACCTTCCCTCTACACTTATCATCTTCACAATTCTAATTCTACTGACTATCCTAGAAATCGCTGTCGCCTTAATCCA	CTTATGAGCGGGCACAGTGATTATAGGCTTTCGCTCTAAGATTAAAAATGCCCTAGCCCACTTCTTACCACAAGGCACACCTACACCCCTTATCCCCATACTAGTTATTATCGAAACCATCAGCCTACTCATTCAACCAATAGCCCTGGCCGTACGCCTAACCGCTAACATTACTGCAGGCCACCTACTCATGCACCTAATTGGAAGC	TTTATGAGCGGGTATAGTGATTATAGGTTTTCGTTTTAAGATTAAAAATGTTTTAGTTTATTTTTTATTATAAGGTATATTTATATTTTTTATTTTTATATTAGTTATTATCGAAATTATTAGTTTATTTATTTAATTAATAGTTTTGGTCGTACGTTTAATCGTTAATATTATTGTAGGTTATTTATTTATGTATTTAATTGGAAGC	TTTCGCTCTAAGATTAAAAATGCCCTAGCCCACTTCTTACCACAAGGCACACCTACACCCCTTATCCCCATACTAGTTATTATCGAAACCATCAGCCTACTCATTCAACCAATAGCCCTGGCCGTACGCCTAACCGCTAACATTA	TTTCGTTTTAAGATTAAAAATGTTTTAGTTTATTTTTTATTATAAGGTATATTTATATTTTTTATTTTTATATTAGTTATTATCGAAATTATTAGTTTATTTATTTAATTAATAGTTTTGGTCGTACGTTTAATCGTTAATATTA
G11778A	chrM	+	GGGTTTATATTTTTATTATTATTTTGTTTAGTAAAT	AACRAAACTTACTAAAAATCATCAAAA	TCCTTGTACTATCCCTATGAGGCATAATTATAACAAGCTCCATCTGCCTACGACAAACAGACCTAAAATCGCTCATTGCATACTCTTCAATCAGCCACATAGCCCTCGTAGTAACAGCCATTCTCATCCAAACCCCCTGAAGCTTCACCGGCGCAGTCATTCTCATAATCGCCCACGGGCTTACATCCTCATTACTATTCTGCCTAGCAAACTCAAACTACGAACGCACTCACAGTCGCATCATAATCCTCTCTCAAGGACTTCAAACTCTACTCCCACTAATAGCTTTTTGATGACTTCTAGCAAGCCTCGCTAACCTCGCCTTACCCCCCACTATTAACCTACTGGGAGAACTCTCTGTGCTAGTAACCACGTTCTCCTGATCAAATATCACTCTCC…	GGGCTTACATCCTCATTACTATTCTGCCTAGCAAACTCAAACTACGAACGCACTCACAGTCGCATCATAATCCTCTCTCAAGGACTTCAAACTCTACTCCCACTAATAGCTTTTTGATGACTTCTAGCAAGCCTCGCT	GGGTTTATATTTTTATTATTATTTTGTTTAGTAAATTTAAATTACGAACGTATTTATAGTCGTATTATAATTTTTTTTTAAGGATTTTAAATTTTATTTTTATTAATAGTTTTTTGATGATTTTTAGTAAGTTTCGTT	TCAAACTACGAACGCACTCACAGTCGCATCATAATCCTCTCTCAAGGACTTCAAACTCTACTCCCACTAATAGCT	TTAAATTACGAACGTATTTATAGTCGTATTATAATTTTTTTTTAAGGATTTTAAATTTTATTTTTATTAATAGTT
